# Supplementary material
Source: PubMed Central journal article supplement (PMC3657281)
Supplement: Supp_Fig1.pdf [file Supp_Fig1.pdf]

## Supplementary Data

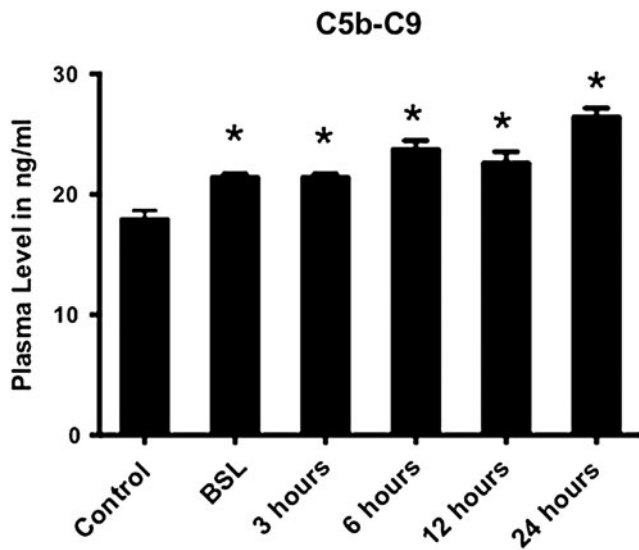

**SUPPLEMENTARY FIG. S1.** Complement cascade activation in the plasma after acute myocardial infarction. Bar graphs showing the increased plasma level of C5b-C9, one of the terminal products of the complement cascade activation, in patients with acute myocardial infarction as compared with controls. The levels were significantly higher at the time of presentation and continued to increase for 48 h after revascularization (\* $P < 0.05$  as compared with controls).
