# Supplementary material
Source: PubMed Central journal article supplement (PMC3657281)
Supplement: Supp_Fig2.pdf [file Supp_Fig2.pdf]

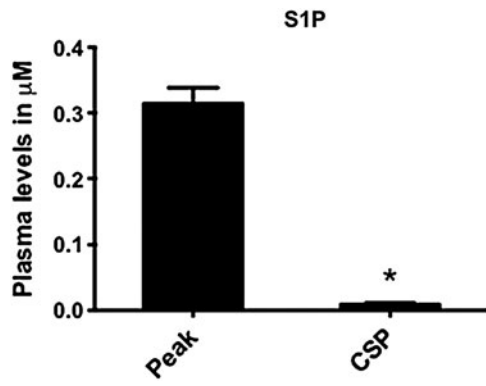

**SUPPLEMENTARY FIG. S2.** Delipidation using activated charcoal significantly reduces the levels of bioactive lipids. Bar graphs showing a significantly lower level of sphingosine-1 phosphate (S1P) in plasma after delipidation with activated charcoal (\* $P < 0.05$  as compared with controls).
