# Supplementary material
Source: PubMed Central journal article supplement (PMC3657281)
Supplement: Supp_Fig3.pdf [file Supp_Fig3.pdf]

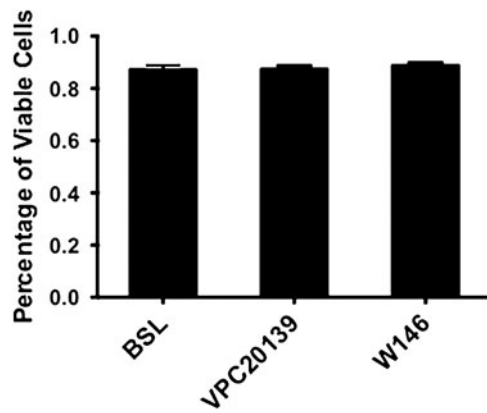

**SUPPLEMENTARY FIG. S3.** Incubation with S1P receptor blockers does not influence bone marrow (BM) cell viability. Bar graphs showing cell viability in BM cells incubated in RPMI supplemented with 0.1% fetal bovine serum alone or with the addition of W146 or VPC20139. The figure demonstrates no significant differences in cell viability, excluding the potential influence of cell viability on the significant differences in cell viability noted in the chemotaxis experiments.
